# Supplementary material for: Sea ice as a source of sea salt aerosol to Greenland ice cores: a model-based study
Source: Copernicus journal article supplement (doi:10.5194/acp-17-9417-2017), 2017-08-07
Supplement: Supplementary file 2 [file acp-17-9417-2017-supplement.zip]

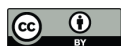

## *Supplement of*

# **Sea ice as a source of sea salt aerosol to Greenland ice cores: a model-based study**

**Rachael H. Rhodes et al.**

*Correspondence to:* Rachael H. Rhodes (rhr34@cam.ac.uk)

- [acp-17-9417-2017-supplement-title-page.pdf](#)
- [RRhodes\\_ACP2017\\_Supplement](#)
  - [RRhodes\\_ACP2017\\_SuppData.xlsx](#)
  - [RRhodes\\_ACP2017\\_Supplement.pdf](#)

The copyright of individual parts of the supplement might differ from the CC BY 3.0 License.
